# Supplementary material
Source: publisher figshare collection journal article supplement (https://gsajournals.figshare.com/articles/dataset/_/22665562)
Supplement: Supplementary file 2 [file 1]

## Supplementary Tables

|                                   |                                                                                                                                                                                                                                                                                                                                                                                                                                                                                                                                                                                                          |       |           |       |           |  |   |       |      |       |  |   |           |     |       |  |
|-----------------------------------|----------------------------------------------------------------------------------------------------------------------------------------------------------------------------------------------------------------------------------------------------------------------------------------------------------------------------------------------------------------------------------------------------------------------------------------------------------------------------------------------------------------------------------------------------------------------------------------------------------|-------|-----------|-------|-----------|--|---|-------|------|-------|--|---|-----------|-----|-------|--|
|                                   | <b>HPL-2</b><br><b>ChIP-seq (23530)</b>                                                                                                                                                                                                                                                                                                                                                                                                                                                                                                                                                                  |       |           |       |           |  |   |       |      |       |  |   |           |     |       |  |
| <b>HPL-2</b><br><b>hypodermis</b> | # Number of query intervals: 23530<br># Number of db intervals: 1572<br># Number of overlaps: 1226<br># Number of possible intervals (estimated): 65530<br># phyper(1226 - 1. 23530. 65530 - 23530. 1572.<br>lower.tail=F)<br># Contingency Table Of Counts<br># <table><tr><td>#</td><td></td><td>in -b</td><td>not in -b</td><td></td></tr><tr><td>#</td><td>in -a</td><td>1226</td><td>22304</td><td></td></tr><tr><td>#</td><td>not in -a</td><td>346</td><td>41654</td><td></td></tr></table><br># p-values for Fisher's exact test<br>left right two-tail ratio<br>1 4.0067e-261 4.6837e-261 6.617 | #     |           | in -b | not in -b |  | # | in -a | 1226 | 22304 |  | # | not in -a | 346 | 41654 |  |
| #                                 |                                                                                                                                                                                                                                                                                                                                                                                                                                                                                                                                                                                                          | in -b | not in -b |       |           |  |   |       |      |       |  |   |           |     |       |  |
| #                                 | in -a                                                                                                                                                                                                                                                                                                                                                                                                                                                                                                                                                                                                    | 1226  | 22304     |       |           |  |   |       |      |       |  |   |           |     |       |  |
| #                                 | not in -a                                                                                                                                                                                                                                                                                                                                                                                                                                                                                                                                                                                                | 346   | 41654     |       |           |  |   |       |      |       |  |   |           |     |       |  |
| <b>HPL-2</b><br><b>intestine</b>  | # Number of query intervals: 23530<br># Number of db intervals: 1665<br># Number of overlaps: 1409<br># Number of possible intervals (estimated): 81142<br># phyper(1409 - 1. 23530. 81142 - 23530. 1665.<br>lower.tail=F)<br># Contingency Table Of Counts<br># <table><tr><td>#</td><td></td><td>in -b</td><td>not in -b</td><td></td></tr><tr><td>#</td><td>in -a</td><td>1409</td><td>22121</td><td></td></tr><tr><td>#</td><td>not in -a</td><td>256</td><td>57356</td><td></td></tr></table><br># p-values for Fisher's exact test<br>left right two-tail ratio<br>1 0 0 14.271                    | #     |           | in -b | not in -b |  | # | in -a | 1409 | 22121 |  | # | not in -a | 256 | 57356 |  |
| #                                 |                                                                                                                                                                                                                                                                                                                                                                                                                                                                                                                                                                                                          | in -b | not in -b |       |           |  |   |       |      |       |  |   |           |     |       |  |
| #                                 | in -a                                                                                                                                                                                                                                                                                                                                                                                                                                                                                                                                                                                                    | 1409  | 22121     |       |           |  |   |       |      |       |  |   |           |     |       |  |
| #                                 | not in -a                                                                                                                                                                                                                                                                                                                                                                                                                                                                                                                                                                                                | 256   | 57356     |       |           |  |   |       |      |       |  |   |           |     |       |  |
| <b>HPL-1</b><br><b>intestine</b>  | # Number of query intervals: 23530<br># Number of db intervals: 1346<br># Number of overlaps: 512<br># Number of possible intervals (estimated): 88730<br># phyper(512 - 1. 23530. 88730 - 23530. 1346.<br>lower.tail=F)<br># Contingency Table Of Counts<br># <table><tr><td>#</td><td></td><td>in -b</td><td>not in -b</td><td></td></tr><tr><td>#</td><td>in -a</td><td>512</td><td>23018</td><td></td></tr><tr><td>#</td><td>not in -a</td><td>834</td><td>64366</td><td></td></tr></table><br># p-values for Fisher's exact test<br>left right two-tail ratio<br>1 9.3088e-21 1.4496e-20 1.717      | #     |           | in -b | not in -b |  | # | in -a | 512  | 23018 |  | # | not in -a | 834 | 64366 |  |
| #                                 |                                                                                                                                                                                                                                                                                                                                                                                                                                                                                                                                                                                                          | in -b | not in -b |       |           |  |   |       |      |       |  |   |           |     |       |  |
| #                                 | in -a                                                                                                                                                                                                                                                                                                                                                                                                                                                                                                                                                                                                    | 512   | 23018     |       |           |  |   |       |      |       |  |   |           |     |       |  |
| #                                 | not in -a                                                                                                                                                                                                                                                                                                                                                                                                                                                                                                                                                                                                | 834   | 64366     |       |           |  |   |       |      |       |  |   |           |     |       |  |

**Table S1.** Number of intersections with HPL-2 ChIP-seq genomic regions and Fisher's exact test p-values.

|                        | Hypodermal well-expressed genes (2264)    | Intestinal well-expressed genes (5890)               | HPL-2 hypodermis (846)                                | HPL-2 intestine (922)                                 | HPL-1 intestine (739)                                 |
|------------------------|-------------------------------------------|------------------------------------------------------|-------------------------------------------------------|-------------------------------------------------------|-------------------------------------------------------|
| HPL-2 hypodermis (846) | Representation factor: 0.7<br>$p < 0.001$ | -                                                    | -                                                     | Representation factor: 7.0<br>$p < 2.607\text{e-}163$ | Representation factor: 6.0<br>$p < 4.590\text{e-}94$  |
| HPL-2 intestine (922)  | -                                         | Representation factor: 1.0<br>$p < 0.383$            | Representation factor: 7.0<br>$p < 2.607\text{e-}163$ | -                                                     | Representation factor: 5.9<br>$p < 1.369\text{e-}100$ |
| HPL-1 intestine (739)  | -                                         | Representation factor: 0.7<br>$p < 6.862\text{e-}07$ | Representation factor: 6.0<br>$p < 4.590\text{e-}94$  | Representation factor: 5.9<br>$p < 1.369\text{e-}100$ | -                                                     |

**Table S2.** Hypergeometric statistical test between gene sets depicted in the table.

| Samples (significant peaks)    | Number of intersections with BLMP-1 peaks (5898)   | Fisher's exact test p-values       |
|--------------------------------|----------------------------------------------------|------------------------------------|
| <b>HPL-1 intestine (1346)</b>  | 169                                                | two-tail ratio<br>1.8565e-09 1.701 |
| Samples (significant peaks)    | Number of intersections with L4 BLMP-1 peaks (549) | Fisher's exact test p-values       |
| <b>HPL-1 intestine (1346)</b>  | 26                                                 | two-tail ratio<br>0.013515 1.701   |
| <b>HPL-2 intestine (1665)</b>  | 34                                                 | two-tail ratio<br>0.0041704 1.726  |
| <b>HPL-2 hypodermis (1572)</b> | 14                                                 | two-tail ratio<br>0.097535 0.630   |

**Table S3.** Number of overlapped peaks between HP1 and BLMP-1 ChIP-seq data and Fisher's exact test p-value.

| Samples (significant peaks)    | Number of true intersections | p-values  |
|--------------------------------|------------------------------|-----------|
| <b>HPL-2 hypodermis (1572)</b> | 1415                         | 3.192e-26 |
| <b>HPL-2 intestine (1665)</b>  | 945                          | 0.002534  |
| <b>HPL-1 intestine (1346)</b>  | 512                          | 4.887e-06 |

**Table S4.** Number of overlapped regions and p-values from Monte Carlo Simulation between HP1 significant peaks and repetitive element coordinates annotation from UCSC based on repeat masker (cell).

| Family  | Type | HPL-2 hyp | HPL-2 int | HPL-1 int | Overlapping between HPL-2 hypodermis and intestine | Overlapping between HPL-1 and HPL-2 intestine | Total repetitive elements in the genome |
|---------|------|-----------|-----------|-----------|----------------------------------------------------|-----------------------------------------------|-----------------------------------------|
| CELE14B | DNA  | 282       | 193       | 94        | 71                                                 | 94                                            | 2451                                    |

|                |                     |     |     |    |    |    |      |
|----------------|---------------------|-----|-----|----|----|----|------|
| CELE42         | DNA                 | 152 | 112 | 32 | 83 | 32 | 963  |
| CELE14A        | DNA                 | 92  | 58  | 26 | 9  | 26 | 624  |
| PALTA5 CE      | DNA                 | 61  | 32  | 16 | 2  | 16 | 1434 |
| GA-rich        | Low complexity      | 48  | 28  | 23 | 9  | 23 | 1433 |
| A-rich         | Low complexity      | 46  | 26  | 20 | -  | 20 | 4877 |
| TIR9TA1B CE    | DNA                 | 40  | 48  | 24 | 11 | 24 | 585  |
| TIR9TA1 CE     | DNA                 | 36  | 40  | 19 | 5  | 19 | 364  |
| HelitronY1A CE | RC                  | 27  | 17  | 10 | -  | 10 | 1468 |
| CELE1          | DNA                 | 75  | 18  | -  | -  | 7  | 1709 |
| CeRep5         | Unknown             | 44  | 12  | -  | -  | 3  | 1324 |
| Helitron2 CE   | Rolling Circle (RC) | 32  | 14  | -  | -  | 8  | 624  |
| MINISAT1 CE    | Satellite           | 30  | 26  | -  | -  | 6  | 3455 |
| CELE45         | SINE                | 24  | 42  | -  | -  | 8  | 463  |
| LR9A           | Unknown             | 17  | 11  | -  | -  | -  | 2150 |
| CERP3          | Unknown             | 17  | 15  | -  | -  | -  | 2915 |
| PALTTAA1 CE    | DNA                 | 17  | 11  | -  | -  | 4  | 1272 |
| CeRep52        | Satellite           | 15  | 12  | -  | 12 | -  | 185  |
| HelitronY4 CE  | Rolling Circle (RC) | 14  | 21  |    | 15 | -  | 780  |
| CELE46B        | DNA                 | 13  | 13  | -  | -  | -  | 1136 |
| HelitronY1 CE  | Rolling Circle (RC) | 13  | 10  | 10 | -  | -  | 802  |
| CER12-I CE     | LTR                 | 12  | 12  | -  | -  | -  | 15   |
| PALTTAA3 CE    | DNA                 | 10  | 12  | -  | -  | -  | 1490 |
| NeSL-1         | LINE                | 10  | 13  | -  | -  | -  | 40   |
| CER8-I CE      | LTR                 | -   | 14  | 13 | -  | 13 | 23   |
| CELE2          | DNA                 | 38  | -   | 11 | -  | -  | 3158 |
| RTE1           | LINE                | -   | 18  | -  | -  | -  | 98   |
| CER9-I CE      | LTR                 | -   | 18  | -  | -  | -  | 78   |
| Vingi-2 CE     | LINE                | -   | 11  | -  | -  | -  | 23   |
| HATN1 CE       | DNA                 | -   | 10  | -  | -  | -  | 48   |
| HAT1 CE        | DNA                 | 25  | -   | -  | -  | -  | 1659 |
| CELE4          | DNA                 | 23  | -   | -  | -  | -  | 831  |
| RC123          | Satellite           | 21  | -   | -  | -  | -  | 700  |
| PALTTAA2 CE    | DNA                 | 20  | -   | -  | -  | -  | 1224 |
| CeRep3         | Unknown             | 18  | -   | -  | -  | -  | 453  |
| PAL5A CE       | DNA                 | 13  | -   | -  | -  | -  | 363  |
| NPAL5A CE      | DNA                 | 13  | -   | -  | -  | -  | 152  |
| NPALTA1 CE     | DNA                 | 13  | -   | -  | -  | -  | 258  |
| CELE46A        | DNA                 | 10  | -   | -  | -  | -  | 2102 |

**Table S5.** Most frequent repetitive element families overlapped with HP1. Only repetitive elements with equal or more than 10 repetitions were considered in each individual dataset for the analysis, simple repeats were excluded.

| STRAIN       | DESCRIPTION                                                     | GENOTYPE                                                                  | REFERENCE            |
|--------------|-----------------------------------------------------------------|---------------------------------------------------------------------------|----------------------|
| <b>BN548</b> | FLP-Frt strain carrying <i>Pdpy-7::FLP</i> transgene on chr IV. | bqSi548[pBN266(unc-119(+)<br><i>Pdpy-7::FLP</i> ) IV; unc-119(ed3)<br>III | (Muñoz-Jimenez 2019) |

|               |                                                                      |                                                                                                                                                                                              |                                                 |
|---------------|----------------------------------------------------------------------|----------------------------------------------------------------------------------------------------------------------------------------------------------------------------------------------|-------------------------------------------------|
| <b>BN577</b>  | Visual marker in pharynx - <i>Pmyo-2::GFP</i> transgene on chr IV.   | bqSi577[pBN306(unc-119(+)<br><i>Pmyo-2::GFP</i> )] IV; may carry unc-119(ed3) III                                                                                                            | (Muñoz-Jiménez et al. 2017)                     |
| <b>EG4322</b> | Strain used for MosScl into chromosome II.                           | ttTi5605 II; unc-119(ed9) III.                                                                                                                                                               | CGC                                             |
| <b>BN1010</b> | Strain for visualization of mKate2::HPL-1                            | mel-28(bq17[G>F>P::mel-28]) III; hpl-1(ot841[mKate2::hpl-1]) X.                                                                                                                              | Made by crossing BN902 and OH14021              |
| <b>BN1011</b> | Strain for visualization of mKate2::HPL-2                            | mel-28(bq17[G>F>P::mel-28]) hpl-1(ot860[mKate2::hpl-2]) III.                                                                                                                                 | Made by crossing BN902 and OH14220              |
| <b>BN1103</b> | Strain for tissue-specific HPL-1 DamID.                              | bqSi1103[pBN494(unc-119(+)<br><i>Phsp16.41&gt;mCh::his-58&gt;dam::hpl-1</i> )] II. May carry unc-119(ed9) III.                                                                               | Made by injection of EG4322 and pBN494 plasmid. |
| <b>BN1105</b> | Strain for tissue-specific HPL-1 DamID co-expressing GFP in pharynx. | bqSi1103[pBN494(unc-119(+)<br><i>Phsp16.41&gt;mCh::his-58&gt;dam::hpl-1</i> )] II; bqSi577[pBN306(unc-119(+)<br><i>Pmyo-2::GFP</i> )] IV. May carry unc-119(ed9) III.                        | Made by crossing BN1103 and BN577               |
| <b>BN1051</b> | Strain for control DamID in intestine.                               | bqSi447[pBN181(unc-119(+)<br><i>hsp16.41p&gt;mCh::his-58&gt;gfp::dam</i> )] II; bqSi997[pBN472(unc-119(+)<br><i>nhx-2p::FLP::SL2::mNG</i> )] IV; may carry unc-119(ed3) or unc-119(ed9) III. | Made by crossing BN448 and BN998.               |
| <b>BN561</b>  | Strain for control DamID in hypodermis.                              | bqSi447[pBN181(unc-119(+)<br><i>Phsp16.41::FRT::mCh::his-58::FRT::gfp::dam</i> )] II; bqSi548[pBN266(unc-119(+)<br><i>Pdpy-7::FLP_D5</i> )] IV. May carry unc-119(ed9) III.                  | Made by crossing BN550 and BN448.               |
| <b>BN550</b>  | Strain for control DamID in hypodermis.                              | FLP-Frt strain carrying <i>Phsp16.41_FRT_mCh_his-58_FRT_gfp_his-58</i> on chr II and <i>Pdpy-7::FLP-D5</i> on chr IV.                                                                        | (Muñoz-Jimenez 2019)                            |
| <b>BN448</b>  | Control strain for tissue-specific DamID                             | bqSi447[pBN181(unc-119(+).P<br><i>hsp16.41::FrT::mch::his-58::FrT::gfp::dam</i> )] II;                                                                                                       | (Muñoz-Jimenez 2019)                            |
| <b>BN1104</b> | Strain for tissue-specific HPL-2 DamID.                              | bqSi1104[pBN495(unc-119(+)<br><i>hsp16.41p&gt;mCh::his-58&gt;dam::hpl-2</i> )] II. May carry unc-119(ed9) III.                                                                               | Made by injection of EG4322 with pBN495 plasmid |
| <b>BN1106</b> | Strain for tissue-specific HPL-2 DamID co-expressing GFP in pharynx. | bqSi1104[pBN495(unc-119(+)<br><i>hsp16.41p&gt;mCh::his-58&gt;dam::hpl-2</i> )] II; bqSi577[pBN306(unc-119(+)<br><i>myo-2p::GFP</i> )] IV. May carry unc-119(ed9) III.                        | Made by crossing BN1104 and BN577.              |

|                       |                                                                                                                                                          |                                                                                                                                                                              |                                    |
|-----------------------|----------------------------------------------------------------------------------------------------------------------------------------------------------|------------------------------------------------------------------------------------------------------------------------------------------------------------------------------|------------------------------------|
| <b>MRS578/B N1108</b> | Strain for tissue-specific HPL-2 DamID in the hypodermis.                                                                                                | bqSi1104[hsp16.41p>mCh::his-58>dam::hpl-2] II; bqSi548[dpy-7p::FLP] IV                                                                                                       | Made by crossing BN1104 and BN548. |
| <b>BN998</b>          | FLP-Frt strain carrying <i>Pnhx-2</i> controlling expression of FLP D5::SL2::mNG transgene on chr IV and visible marker on chr II (Plmn-1::mCh::his-58). | bqSi189[pBN13(unc-119(+)<br>lmn-1p::mCherry::his-58)] II;<br>bqSi997[pBN472(unc-119(+)<br>nhx-2p::FLP D5::SL2::mNG)] IV. May carry unc-119(ed3) or unc-119(ed9) III.         | (Cabianca et al. 2019)             |
| <b>MRS579/B N1109</b> | Strain for tissue-specific HPL-1 DamID in the intestine.                                                                                                 | bqSi1104[pBN494(unc-119(+)<br><i>Phsp16.41</i> >mCh::his-58>dam::hpl-1)] II;<br>bqSi997[pBN472(unc-119(+)<br><i>Pnhx-2</i> ::FLP::SL2::mNG)] IV. May carry unc-119(ed9) III. | Made by crossing BN1103 and BN998. |
| <b>MRS580/B N1110</b> | Strain for tissue-specific HPL-2 DamID in the intestine.                                                                                                 | bqSi1103[pBN495(unc-119(+)<br><i>Phsp16.41</i> >mCh::his-58>dam::hpl-2)] II;<br>bqSi997[pBN472(unc-119(+)<br>nhx-2p::FLP::SL2::mNG)] IV. May carry <i>unc-119(ed9)</i> III.  | Made by crossing BN1104 and BN998. |
| <b>GM119</b>          | <i>E.coli</i> dam-3 dcm-6 knockout strain                                                                                                                | (Arraj and Marinus 1983)                                                                                                                                                     |                                    |

**Table S6.** List of *C. elegans* and bacterial strains used.

| Plasmid name  | Description                                                  | Reference        |
|---------------|--------------------------------------------------------------|------------------|
| <b>pBN494</b> | <i>Phsp-16.41</i> ::FRT::mCh::his-58::FRT::hpl-1::Dam Chr II | This publication |
| <b>pBN495</b> | <i>Phsp-16.41</i> ::FRT::mCh::his-58::FRT::hpl-2::Dam Chr II | This publication |

**Table S7.** List of plasmids used.

| Sample                     | Raw reads  | Cut reads | Mapped reads | GATC reads (% from Raw reads) |
|----------------------------|------------|-----------|--------------|-------------------------------|
| GFP::Dam hyp (BN561) I     | 15,773,728 | 6,542,411 | 2,872,416    | 2,862,349 (18,15%)            |
| GFP::Dam hyp (BN561) II    | 9,247,899  | 3,599,466 | 1,304,548    | 1,286,460 (13,91%)            |
| GFP::Dam int (BN1051) I    | 18,066,270 | 7,418,519 | 3,660,999    | 3,655,161 (20,23%)            |
| GFP::Dam int (BN1051) II   | 4,573,067  | 2,080,559 | 1,338,144    | 1,336,648 (29,23%)            |
| Dam::hpl-2 hyp (MRS578) I  | 14,194,267 | 6,551,959 | 4,162,172    | 4,154,179 (29,27%)            |
| Dam::hpl-2 hyp (MRS578) II | 8,507,806  | 3,473,687 | 1,594,499    | 1,562,681 (18,37%)            |
| Dam::hpl-1 int (MRS579) I  | 20,901,460 | 9,376,852 | 1,560,420    | 1,541,018 (39,23%)            |
| Dam::hpl-1 int (MRS579) II | 8,061,225  | 3,861,200 | 696,028      | 694,399 (8,61%)               |
| Dam::hpl-2 int (MRS580) I  | 18,337,259 | 8,265,167 | 4,253,333    | 4,232,349 (23,08%)            |
| Dam::hpl-2 int (MRS580) II | 1,583,607  | 747,426   | 527,174      | 526,083 (33,22%)              |

**Table S8.** Quality controls metrics of sequencing libraries from DamID-seq data. Abbreviations hyp: hypodermis; int:intestine

| Sample name              | Dataset (GEO/ modENCODE) | Strain | Larval stage                                 | Antibody      | Temperature (°C) |
|--------------------------|--------------------------|--------|----------------------------------------------|---------------|------------------|
| <b>ChIP dataset</b>      |                          |        |                                              |               |                  |
| HPL-2 ChIP-seq           | GSE49749/modENCODE_5976  | N2     | L3                                           | HPL-2 SDQ2340 | 20               |
| <b>Histones datasets</b> |                          |        |                                              |               |                  |
| H3K9me1                  | GSE25353                 | N2     | L3 (mixed Male and Hermaphrodite population) | AB9045        | 20               |
| H3K9me2                  | GSE49728                 | N2     | L3 (mixed Male and Hermaphrodite population) | HK00008       | 20               |
| H3K9me3                  | GSE49719                 | N2     | L3 (mixed Male and Hermaphrodite population) | AB8898        | 20               |
| H3K27me3                 | GSE49724                 | N2     | L3 (mixed Male and Hermaphrodite population) | UP07449       | 20               |
| BLMP-1                   | GSE25803/modENCODE 2612  | OP109  | L1                                           | GFP::3xFlag   | 20               |

**Table S9.** Description and references of Dataset used for comparison.
